# Supplementary material for: Machine learning-assisted flexible wearable device for tyrosine detection
Source: Royal Society of Chemistry journal article supplement (doi:10.1039/d3ra02900j), 2023-01-01
Supplement: d3ra02900j1.pdf [file d3ra02900j1.pdf]

## Supporting information

# Machine learning-assisted flexible wearable device for tyrosine detection

Qiwen Bao<sup>a</sup>, Gang Li<sup>a</sup>, Wenbo Cheng<sup>b</sup>, Zhengchun Yang<sup>c</sup>, Zilian Qu<sup>d</sup>, Jun We<sup>c</sup> and Ling Lin<sup>a\*</sup>

---

<sup>a</sup> School of Precision Instrument and Optoelectronic Engineering, the State Key Laboratory of Precision Measuring Technology and Instruments, 92 Weijin Road, Tianjin University, Tianjin 300072, China

<sup>b</sup> Suzhou Institute of Biomedical Engineering and Technology, Chinese Academy of Sciences Suzhou, 215163, P. R. China

<sup>c</sup> School of Electrical and Electronic Engineering, Tianjin Key Laboratory of Film Electronic & Communication Devices, Advanced Materials and Printed Electronics Center, Tianjin University of Technology, Tianjin 300384, China

<sup>d</sup> Beijing Informat Technol Coll, Beijing 100015, Peoples R China

<sup>e</sup> School of Materials Science and Engineering, Harbin Institute of Technology, Shenzhen 518055, China

\* Corresponding author (email: linling@tju.edu.cn)

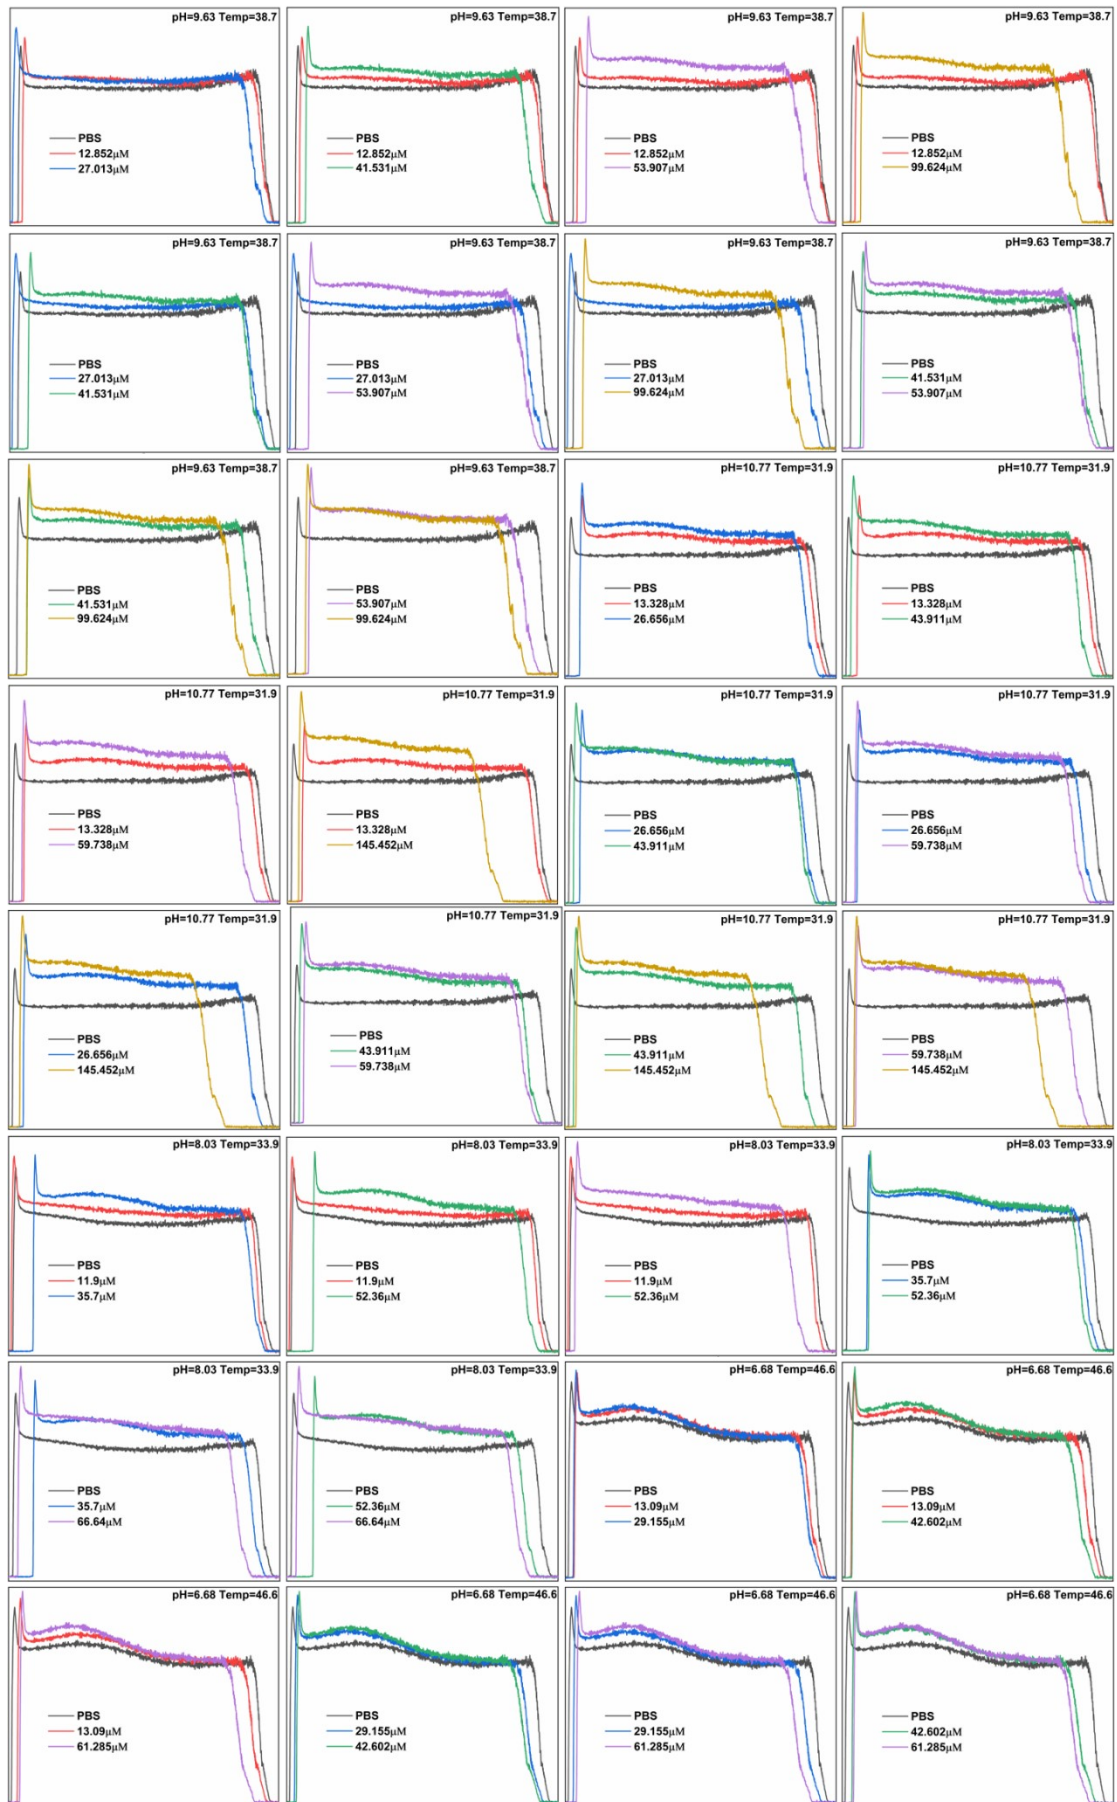

**Fig S1** 32 sets of DPV curves of CS/CB-GO/paper-based electrode in artificial urine at different pH and temperature. values.

**Table S1** The statistics for the collected eigenvalue data.

| CON_1  | I_0     | I_1     | I_2     | V_0    | V_1    | V_2    | VP_0   | VP_1   | VP_2   | CON_2   | PH    | TEMP |
|--------|---------|---------|---------|--------|--------|--------|--------|--------|--------|---------|-------|------|
| 12.852 | 0.26671 | 0.26462 | 0.26096 | 1.5468 | 1.5034 | 1.4264 | 1.6028 | 1.5734 | 1.4922 | 27.013  | 9.63  | 38.7 |
| 12.852 | 0.26671 | 0.26462 | 0.26585 | 1.5468 | 1.5034 | 1.4166 | 1.6028 | 1.5734 | 1.4726 | 41.531  | 9.63  | 38.7 |
| 12.852 | 0.26671 | 0.26462 | 0.27865 | 1.5468 | 1.5034 | 1.3452 | 1.6028 | 1.5734 | 1.4292 | 53.907  | 9.63  | 38.7 |
| 12.852 | 0.26671 | 0.26462 | 0.27397 | 1.5468 | 1.5034 | 1.2262 | 1.6028 | 1.5734 | 1.3424 | 99.624  | 9.63  | 38.7 |
| 27.013 | 0.26671 | 0.26096 | 0.26585 | 1.5468 | 1.4264 | 1.4166 | 1.6028 | 1.4922 | 1.4726 | 41.531  | 9.63  | 38.7 |
| 27.013 | 0.26671 | 0.26096 | 0.27865 | 1.5468 | 1.4264 | 1.3452 | 1.6028 | 1.4922 | 1.4292 | 53.907  | 9.63  | 38.7 |
| 27.013 | 0.26671 | 0.26096 | 0.27397 | 1.5468 | 1.4264 | 1.2262 | 1.6028 | 1.4922 | 1.3424 | 99.624  | 9.63  | 38.7 |
| 41.531 | 0.26671 | 0.26585 | 0.30298 | 1.5468 | 1.4166 | 1.2304 | 1.6028 | 1.4726 | 1.4292 | 53.907  | 9.63  | 38.7 |
| 41.531 | 0.26671 | 0.26585 | 0.29906 | 1.5468 | 1.4166 | 1.2374 | 1.6028 | 1.4726 | 1.3424 | 99.624  | 9.63  | 38.7 |
| 53.907 | 0.26671 | 0.27865 | 0.27397 | 1.5468 | 1.3452 | 1.2262 | 1.6028 | 1.4292 | 1.3424 | 99.624  | 9.63  | 38.7 |
| 13.328 | 0.25738 | 0.27173 | 0.28424 | 1.5678 | 1.4838 | 1.425  | 1.6    | 1.5482 | 1.488  | 26.656  | 10.77 | 31.9 |
| 13.328 | 0.25738 | 0.27173 | 0.28324 | 1.5678 | 1.4838 | 1.4124 | 1.6    | 1.5482 | 1.4656 | 43.911  | 10.77 | 31.9 |
| 13.328 | 0.25738 | 0.27173 | 0.28753 | 1.5678 | 1.4838 | 1.348  | 1.6    | 1.5482 | 1.4138 | 59.738  | 10.77 | 31.9 |
| 13.328 | 0.25738 | 0.27173 | 0.29858 | 1.5678 | 1.4838 | 1.0624 | 1.6    | 1.5482 | 1.1562 | 145.452 | 10.77 | 31.9 |
| 26.656 | 0.25738 | 0.28424 | 0.28324 | 1.5678 | 1.425  | 1.4124 | 1.6    | 1.488  | 1.4656 | 43.911  | 10.77 | 31.9 |
| 26.656 | 0.25738 | 0.28424 | 0.28753 | 1.5678 | 1.425  | 1.348  | 1.6    | 1.488  | 1.4138 | 59.738  | 10.77 | 31.9 |
| 26.656 | 0.25738 | 0.28424 | 0.1516  | 1.5678 | 1.425  | 1.0624 | 1.6    | 1.488  | 1.1562 | 145.452 | 10.77 | 31.9 |
| 43.911 | 0.25738 | 0.28324 | 0.28753 | 1.5678 | 1.4124 | 1.348  | 1.6    | 1.4656 | 1.4138 | 59.738  | 10.77 | 31.9 |
| 43.911 | 0.25738 | 0.28324 | 0.1516  | 1.5678 | 1.4124 | 1.0624 | 1.6    | 1.4656 | 1.1562 | 145.452 | 10.77 | 31.9 |
| 59.738 | 0.25738 | 0.28753 | 0.1516  | 1.5678 | 1.348  | 1.0624 | 1.6    | 1.4138 | 1.1562 | 145.452 | 10.77 | 31.9 |
| 13.09  | 0.24298 | 0.24684 | 0.24633 | 1.418  | 1.3382 | 1.2808 | 1.4418 | 1.3858 | 1.3536 | 29.155  | 6.86  | 46.6 |
| 13.09  | 0.24298 | 0.24684 | 0.25094 | 1.418  | 1.3382 | 1.2332 | 1.4418 | 1.3858 | 1.3228 | 42.602  | 6.86  | 46.6 |
| 13.09  | 0.24298 | 0.24684 | 0.2532  | 1.418  | 1.3382 | 1.208  | 1.4418 | 1.3858 | 1.285  | 61.285  | 6.86  | 46.6 |
| 29.155 | 0.24298 | 0.24633 | 0.25094 | 1.418  | 1.2808 | 1.2332 | 1.4418 | 1.3536 | 1.3228 | 42.602  | 6.86  | 46.6 |
| 29.155 | 0.24298 | 0.24633 | 0.2532  | 1.418  | 1.2808 | 1.208  | 1.4418 | 1.3536 | 1.285  | 61.285  | 6.86  | 46.6 |
| 42.602 | 0.24298 | 0.25094 | 0.2532  | 1.418  | 1.2332 | 1.208  | 1.4418 | 1.3228 | 1.285  | 61.285  | 6.86  | 46.6 |
| 11.9   | 0.22254 | 0.23026 | 0.23177 | 1.565  | 1.5328 | 1.4404 | 1.6028 | 1.5734 | 1.5244 | 35.7    | 8.03  | 33.9 |
| 11.9   | 0.22254 | 0.23026 | 0.23483 | 1.565  | 1.5328 | 1.4068 | 1.6028 | 1.5734 | 1.4782 | 52.36   | 8.03  | 33.9 |
| 11.9   | 0.22254 | 0.23026 | 0.2364  | 1.565  | 1.5328 | 1.32   | 1.6028 | 1.5734 | 1.397  | 66.64   | 8.03  | 33.9 |
| 35.7   | 0.22254 | 0.23177 | 0.23483 | 1.565  | 1.4404 | 1.4068 | 1.6028 | 1.5244 | 1.4782 | 52.36   | 8.03  | 33.9 |
| 35.7   | 0.22254 | 0.23177 | 0.2364  | 1.565  | 1.4404 | 1.32   | 1.6028 | 1.5244 | 1.397  | 66.64   | 8.03  | 33.9 |
| 52.36  | 0.22254 | 0.23483 | 0.2364  | 1.565  | 1.4068 | 1.32   | 1.6028 | 1.4782 | 1.397  | 66.64   | 8.03  | 33.9 |

**Table S2** Output of different algorithm models running 5 times on 70 % samples.

| Linear | R <sup>2</sup> | RMSE    | MAE    | Recovery (%) |
|--------|----------------|---------|--------|--------------|
| 1      | 0.9433         | 7.0993  | 5.9615 | 98.43        |
| 2      | 0.9574         | 6.7003  | 5.8862 | 97.97        |
| 3      | 0.7938         | 8.2963  | 6.7799 | 89.76        |
| 4      | 0.8986         | 6.23000 | 4.7042 | 95.30        |
| 5      | 0.9458         | 8.1168  | 7.1117 | 7.94         |

|                       |        |         |         |       |
|-----------------------|--------|---------|---------|-------|
| <b>Elastic Net</b>    |        |         |         |       |
| 1                     | 0.9473 | 7.3974  | 6.2411  | 99.39 |
| 2                     | 0.9874 | 4.1573  | 3.3912  | 99.75 |
| 3                     | 0.8926 | 7.6704  | 6.5640  | 95.73 |
| 4                     | 0.9407 | 7.8171  | 6.7274  | 97.78 |
| 5                     | 0.6001 | 6.2013  | 5.1703  | 91.20 |
| <b>KNR</b>            |        |         |         |       |
| 1                     | 0.7319 | 16.9687 | 15.1117 | 86.94 |
| 2                     | 0.2793 | 31.5270 | 24.4051 | 82.28 |
| 3                     | 0.5519 | 25.8092 | 23.0374 | 88.37 |
| 4                     | 0.6821 | 17.5036 | 13.7419 | 86.40 |
| 5                     | 0.6385 | 17.6337 | 15.0135 | 87.49 |
| <b>DTR</b>            |        |         |         |       |
| 1                     | 0.8305 | 13.6664 | 6.5352  | 91.53 |
| 2                     | 0.9703 | 5.5520  | 3.6593  | 98.58 |
| 3                     | 0.5904 | 21.3690 | 16.4636 | 94.55 |
| 4                     | 0.9196 | 8.9904  | 5.5930  | 96.99 |
| 5                     | 0.9203 | 11.7576 | 8.4093  | 96.01 |
| <b>Lasso</b>          |        |         |         |       |
| 1                     | 0.9415 | 7.5584  | 5.8636  | 97.48 |
| 2                     | 0.9629 | 5.8957  | 4.4400  | 98.17 |
| 3                     | 0.4068 | 14.0672 | 8.2738  | 75.70 |
| 4                     | 0.9030 | 13.1099 | 6.0096  | 95.61 |
| 5                     | 0.8743 | 8.2852  | 6.7756  | 96.20 |
| <b>Bayesian Ridge</b> |        |         |         |       |
| 1                     | 0.9369 | 8.7832  | 7.4365  | 96.91 |
| 2                     | 0.9659 | 7.1891  | 5.5647  | 98.85 |
| 3                     | 0.8875 | 10.2222 | 7.3245  | 94.29 |
| 4                     | 0.8363 | 12.4193 | 7.7389  | 92.87 |
| 5                     | 0.7048 | 15.6021 | 12.5438 | 95.12 |
| <b>Ridge</b>          |        |         |         |       |
| 1                     | 0.9828 | 5.4170  | 4.4912  | 99.24 |
| 2                     | 0.9060 | 10.1210 | 8.7042  | 97.35 |
| 3                     | 0.8237 | 8.3220  | 7.0380  | 93.61 |

|   |        |        |        |       |
|---|--------|--------|--------|-------|
| 4 | 0.9465 | 8.3077 | 7.0377 | 97.60 |
| 5 | 0.9542 | 6.9038 | 4.9683 | 97.86 |
